# Supplementary material
Source: Springer Nature journal article supplement (https://www.springermedizin.de/resource/supplementary/13058_2010_2751_MOESM7_ESM.pdf/9702078)

Plotted SNPs

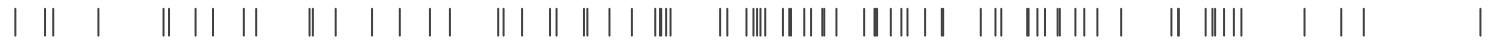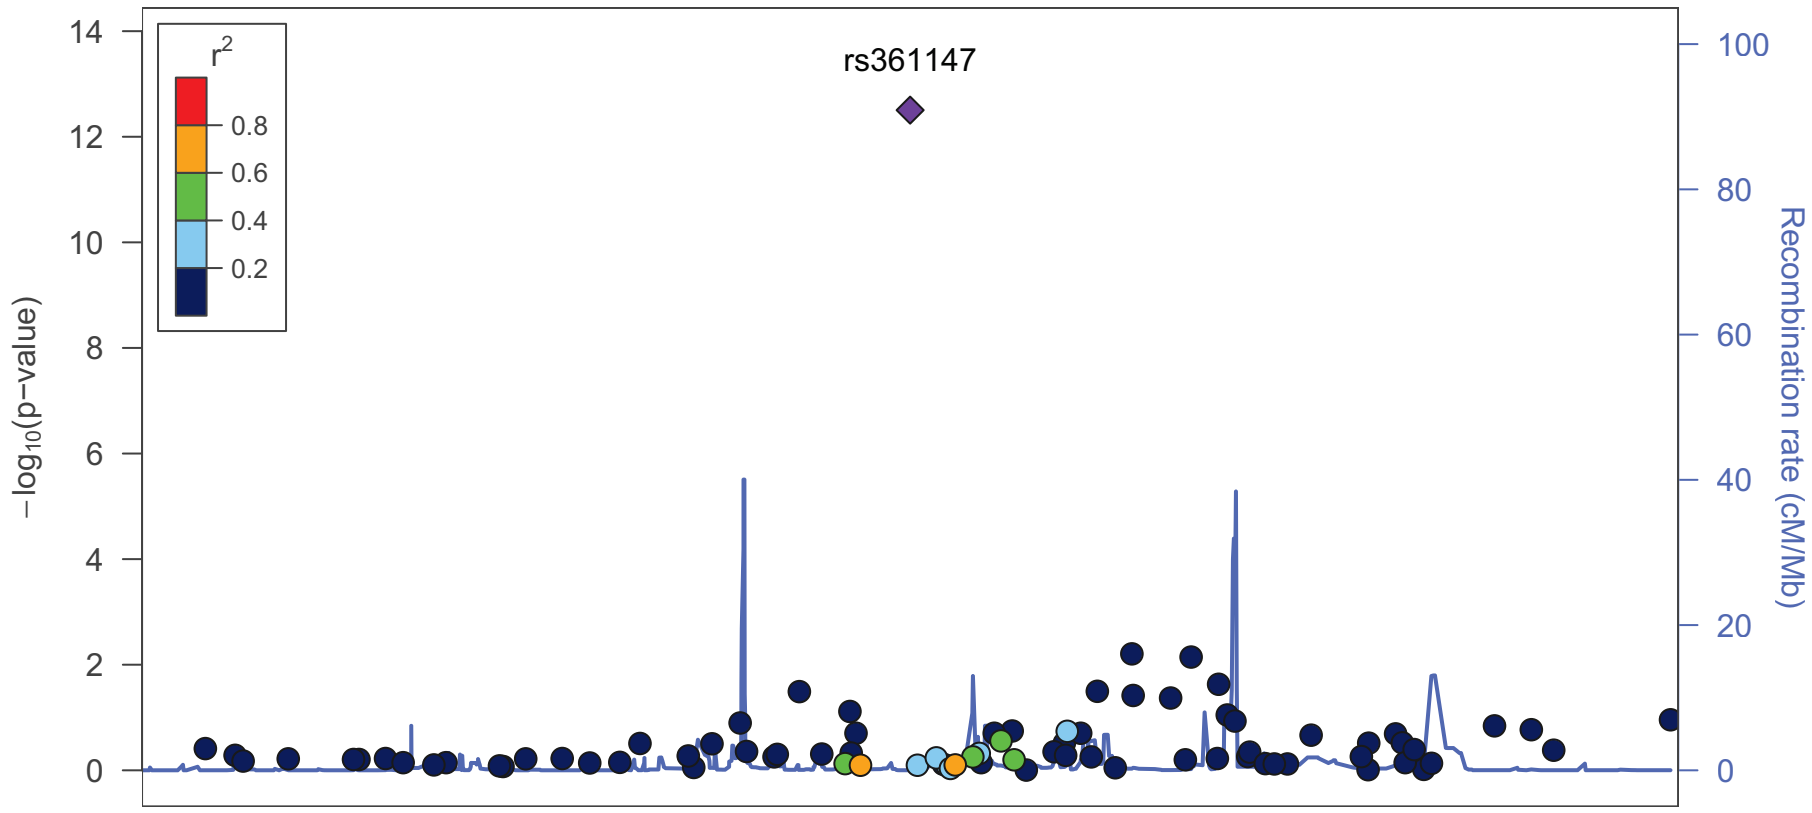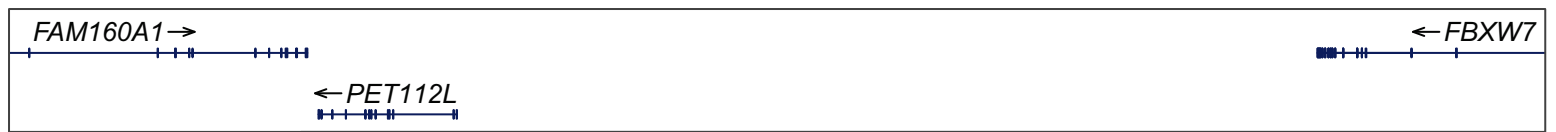

152.8                      153                      153.2                      153.4                      153.6

Position on chr4 (Mb)

Supplement: MOESM7 [file 9702078]
